# Supplementary material for: Surveillance of Human Rotavirus in Wuhan, China (2011–2019): Predominance of G9P[8] and Emergence of G12
Source: MDPI journal article supplement (doi:10.3390/pathogens9100810), 2020-10-02
Supplement: s1 [file s1]

1

2

3

4

5

6

7
